# Supplementary material for: Metabolic Effects of Gastrectomy and Duodenal Bypass in Early Gastric Cancer Patients with T2DM: A Prospective Single-Center Cohort Study
Source: MDPI journal article supplement (doi:10.3390/jcm10174008), 2021-09-04

## **Supplementary information**

# **Metabolic Effects of Gastrectomy and Duodenal Bypass in Early Gastric Cancer Patients with T2DM: A Prospective Single-Center Cohort Study**

Young Ki Lee<sup>1#</sup>, Eun Kyung Lee<sup>1,2#</sup>, You Jin Lee<sup>1\*</sup>, Bang Wool Eom<sup>3</sup>, Hong Man Yoon,<sup>2,3</sup>, Young-Il Kim<sup>2,3</sup>, Soo Jeong Cho<sup>3</sup>, Jong Yeul Lee<sup>3</sup>, Chan Gyoo Kim<sup>3</sup>, Sun-Young Kong<sup>2,4</sup>, Min Kyong Yoo<sup>5</sup>, Yul Hwangbo<sup>1,6</sup>, Young-Woo Kim<sup>3</sup>, Il Ju Choi<sup>3,6</sup>, Hak Jin Kim<sup>7</sup>, Mi Hyang Kwak<sup>7</sup> and Keun Won Ryu<sup>3\*</sup>

Supplementary Table S1. Changes in the metabolic hormone levels (log10-transformed).

| Variables                   | Groups  | Difference compared to the control group <sup>1</sup> |                            |              | Change from the baseline <sup>2</sup> |              |                  |              |
|-----------------------------|---------|-------------------------------------------------------|----------------------------|--------------|---------------------------------------|--------------|------------------|--------------|
|                             |         |                                                       |                            |              | 3-month visit                         |              | 1-year visit     |              |
|                             |         | Estimates                                             | 10 <sup>^(estimates)</sup> | p value      | Mean±SD                               | p value      | Mean±SD          | p value      |
| <b>Fasting</b>              |         |                                                       |                            |              |                                       |              |                  |              |
| Log (ghrelin)               | ESD     | 0                                                     | 1                          | Ref.         | 0.13±0.33                             | 0.410        | 0.04±0.30        | >0.999       |
|                             | Group 1 | 0.02                                                  | 1.05                       | 0.800        | 0.06±0.40                             | 0.985        | 0.18±0.41        | 0.092        |
|                             | Group 2 | -0.07                                                 | 0.85                       | 0.623        | 0.13±0.37                             | >0.999       | -0.12±0.23       | 0.784        |
| Log (GIP)                   | ESD     | 0                                                     | 1                          | Ref.         | 0.14±0.21                             | 0.066        | 0.18±0.52        | 0.497        |
|                             | Group 1 | -0.06                                                 | 0.87                       | 0.471        | 0.06±0.31                             | 0.665        | -0.01±0.38       | >0.999       |
|                             | Group 2 | -0.01                                                 | 0.98                       | 0.933        | 0.13±0.20                             | 0.562        | 0.01±0.34        | >0.999       |
| Log (GLP1)                  | ESD     | 0                                                     | 1                          | Ref.         | 0.14±0.30                             | 0.256        | 0.20±0.48        | 0.377        |
|                             | Group 1 | 0.04                                                  | 1.10                       | 0.659        | 0.13±0.36                             | 0.191        | 0.25±0.51        | 0.062        |
|                             | Group 2 | -0.03                                                 | 0.94                       | 0.868        | 0.01±0.33                             | >0.999       | -0.14±0.55       | >0.999       |
| Log (glucagon)              | ESD     | 0                                                     | 1                          | Ref.         | 0.23±0.48                             | 0.322        | <b>0.46±0.54</b> | <b>0.027</b> |
|                             | Group 1 | -0.01                                                 | 0.97                       | 0.899        | 0.09±0.41                             | 0.635        | 0.14±0.54        | 0.485        |
|                             | Group 2 | -0.15                                                 | 0.70                       | 0.441        | 0.09±0.39                             | >0.999       | -0.10±0.18       | 0.725        |
| Log (leptin)                | ESD     | 0                                                     | 1                          | Ref.         | -0.07±0.19                            | 0.432        | 0.03±0.40        | >0.999       |
|                             | Group 1 | <b>-0.21</b>                                          | <b>0.61</b>                | <b>0.008</b> | <b>-0.27±0.30</b>                     | <b>0.001</b> | -0.17±0.57       | 0.326        |
|                             | Group 2 | -0.22                                                 | 0.61                       | 0.116        | -0.29±0.53                            | 0.699        | -0.06±0.63       | >0.999       |
| Log (PAI-1)                 | ESD     | 0                                                     | 1                          | Ref.         | -0.12±0.47                            | 0.910        | -0.20±0.90       | 0.973        |
|                             | Group 1 | <b>-0.22</b>                                          | <b>0.60</b>                | <b>0.007</b> | -0.09±0.25                            | 0.189        | -0.06±0.37       | 0.851        |
|                             | Group 2 | <b>-0.27</b>                                          | <b>0.53</b>                | <b>0.029</b> | -0.13±0.21                            | 0.618        | -0.12±0.31       | >0.999       |
| Log (resistin)              | ESD     | 0                                                     | 1                          | Ref.         | <b>-0.20±0.25</b>                     | <b>0.035</b> | -0.18±0.39       | 0.297        |
|                             | Group 1 | 0.06                                                  | 1.15                       | 0.279        | 0.00±0.27                             | >0.999       | -0.08±0.37       | 0.648        |
|                             | Group 2 | <b>-0.20</b>                                          | <b>0.64</b>                | <b>0.040</b> | -0.36±0.44                            | 0.394        | -0.34±0.29       | 0.203        |
| Log (visfatin)              | ESD     | 0                                                     | 1                          | Ref.         | 0.06±0.36                             | >0.999       | -0.15±0.67       | 0.941        |
|                             | Group 1 | -0.04                                                 | 0.91                       | 0.754        | -0.03±0.54                            | >0.999       | 0.07±0.54        | >0.999       |
|                             | Group 2 | -0.37                                                 | 0.43                       | 0.107        | -0.60±0.87                            | 0.718        | -0.29±0.29       | 0.279        |
| <b>Postprandial 2 hours</b> |         |                                                       |                            |              |                                       |              |                  |              |
| Log (ghrelin)               | ESD     | 0                                                     | 1                          | Ref.         | 0.07±0.28                             | 0.790        | 0.04±0.26        | >0.999       |
|                             | Group 1 | 0.01                                                  | 1.02                       | 0.941        | 0.00±0.40                             | >0.999       | 0.20±0.38        | 0.053        |

|                |         |              |             |              |                   |              |                  |              |
|----------------|---------|--------------|-------------|--------------|-------------------|--------------|------------------|--------------|
|                | Group 2 | -0.12        | 0.75        | 0.445        | 0.29±0.29         | 0.288        | -0.42±0.69       | 0.627        |
| Log (GIP)      | ESD     | 0            | 1           | Ref.         | 0.00±0.27         | >0.999       | 0.26±0.58        | 0.344        |
|                | Group 1 | -0.08        | 0.82        | 0.291        | -0.02±0.30        | >0.999       | 0.02±0.41        | >0.999       |
|                | Group 2 | -0.05        | 0.90        | 0.736        | 0.00±0.17         | >0.999       | -0.26±0.53       | 0.816        |
| Log (GLP1)     | ESD     | 0            | 1           | Ref.         | 0.08±0.33         | 0.894        | 0.21±0.53        | 0.427        |
|                | Group 1 | 0.04         | 1.10        | 0.722        | 0.05±0.48         | >0.999       | 0.24±0.54        | 0.105        |
|                | Group 2 | 0.14         | 1.39        | 0.485        | 0.11±0.14         | 0.421        | -0.20±0.62       | >0.999       |
| Log (glucagon) | ESD     | 0            | 1           | Ref.         | 0.19±0.41         | 0.354        | <b>0.46±0.47</b> | <b>0.018</b> |
|                | Group 1 | 0.01         | 1.02        | 0.944        | 0.14±0.41         | 0.268        | 0.20±0.53        | 0.231        |
|                | Group 2 | 0.12         | 1.32        | 0.582        | 0.21±0.20         | 0.262        | -0.02±0.39       | >0.999       |
| Log (leptin)   | ESD     | 0            | 1           | Ref.         | -0.08±0.21        | 0.475        | 0.13±0.48        | 0.792        |
|                | Group 1 | <b>-0.17</b> | <b>0.68</b> | <b>0.043</b> | <b>-0.20±0.34</b> | <b>0.033</b> | -0.16±0.47       | 0.284        |
|                | Group 2 | -0.26        | 0.54        | 0.070        | -0.32±0.46        | 0.517        | -0.15±0.54       | >0.999       |
| Log (PAI-1)    | ESD     | 0            | 1           | Ref.         | -0.28±0.40        | 0.062        | -0.34±0.75       | 0.326        |
|                | Group 1 | -0.05        | 0.90        | 0.537        | -0.07±0.28        | 0.613        | -0.01±0.28       | >0.999       |
|                | Group 2 | -0.11        | 0.78        | 0.390        | 0.02±0.22         | >0.999       | 0.00±0.27        | >0.999       |
| Log (resistin) | ESD     | 0            | 1           | Ref.         | -0.14±0.24        | 0.138        | -0.09±0.37       | 0.923        |
|                | Group 1 | 0.10         | 1.25        | 0.076        | 0.05±0.24         | 0.737        | 0.03±0.26        | >0.999       |
|                | Group 2 | -0.07        | 0.85        | 0.430        | -0.10±0.25        | 0.963        | -0.18±0.11       | 0.098        |
| Log (visfatin) | ESD     | 0            | 1           | Ref.         | -0.05±0.53        | >0.999       | 0.07±0.75        | >0.999       |
|                | Group 1 | -0.07        | 0.86        | 0.640        | -0.09±0.63        | >0.999       | 0.17±0.55        | 0.349        |
|                | Group 2 | -0.11        | 0.78        | 0.651        | -0.19±0.31        | 0.638        | -0.27±0.19       | 0.126        |

<sup>1</sup>The difference in the change of each variable during the follow-up period, compared to the control group in the group of gastrectomy with duodenal bypass (group 1) and the group of gastrectomy without duodenal bypass (group 2), is estimated using a linear mixed model. The estimates and p values are adjusted for age, sex, time from the baseline, and the baseline measurements of each assessed variable.

<sup>2</sup>The statistical significance of the change in each variable at each visit compared to the baseline is assessed using paired *t*-test. P values are adjusted using the method of Dunnett for multiple comparisons between two visit points and the baseline.

Significant values ( $p < 0.05$ ) are in boldface type.

SD, standard deviation; ESD, endoscopic submucosal dissection; Ref, reference value; BMI, body mass index; Log, log<sub>10</sub>-transformed; GIP, gastric inhibitory polypeptide; GLP-1, glucagon-like peptide-1; PAI-1, plasminogen activator inhibitor-1.

Supplementary Table S2. Changes in the effects of gastrectomy with duodenal bypass according to the candidate effect modifiers, on the probability of better 1-year glycemic control at 1-year visit.

| Candidate effect modifiers                 | Estimates for the interaction terms |                   |
|--------------------------------------------|-------------------------------------|-------------------|
|                                            | Changes in OR (95%CI)               | p for interaction |
| BMI (per kg/m <sup>2</sup> )               | 1.42 (0.86-2.35)                    | 0.167             |
| HbA1c (per %point)                         | 0.49 (0.17-1.40)                    | 0.182             |
| Fasting glucose (per 10 mg/dL)             | 0.78 (0.46-1.33)                    | 0.360             |
| Postprandial 2-hour glucose (per 10 mg/dL) | 0.94 (0.80-1.10)                    | 0.420             |
| HOMA-IR (per 1)                            | 2.16 (0.75-6.21)                    | 0.152             |
| <b>Fasting</b>                             |                                     |                   |
| Ghrelin (per pg/mL)                        | 1.00 (1.00-1.00)                    | 0.978             |
| GIP (per pg/mL)                            | 1.00 (0.99-1.00)                    | 0.356             |
| GLP-1 (per pg/mL)                          | 1.00 (0.99-1.01)                    | 0.446             |
| Glucagon (per pg/mL)                       | 1.01 (1.00-1.02)                    | 0.117             |
| <b>Leptin (per ng/mL)</b>                  | <b>3.06 (1.29-7.27)</b>             | <b>0.011</b>      |
| <b>PAI-1 (per ng/mL)</b>                   | <b>0.95 (0.91-0.99)</b>             | <b>0.013</b>      |
| Resistin (per ng/mL)                       | 1.17 (0.77-1.77)                    | 0.463             |
| Visfatin (per ng/mL)                       | 1.09 (0.75-1.59)                    | 0.655             |
| <b>Postprandial 2 hours</b>                |                                     |                   |
| Ghrelin (per pg/mL)                        | 1.00 (1.00-1.00)                    | 0.713             |
| GIP (per pg/mL)                            | 1.00 (0.99-1.01)                    | 0.754             |
| GLP-1 (per pg/mL)                          | 1.00 (0.99-1.01)                    | 0.436             |
| Glucagon (per pg/mL)                       | 1.01 (1.00-1.02)                    | 0.125             |
| <b>Leptin (per ng/mL)</b>                  | <b>3.67 (1.39-9.71)</b>             | <b>0.009</b>      |
| PAI-1 (per ng/mL)                          | 0.99 (0.97-1.01)                    | 0.358             |
| Resistin (per ng/mL)                       | 1.23 (0.74-2.03)                    | 0.424             |
| Visfatin (per ng/mL)                       | 0.99 (0.66-1.49)                    | 0.973             |

Changes in the effects of gastrectomy with duodenal bypass on 1-year glycemic control status (with endoscopic submucosal dissection as the control) are presented according to candidate

effect modifiers. Each interaction term was the product of 'gastrectomy with duodenal bypass' and the level of the candidate effect modifier. Significance of the effect modifications are tested by entering the interaction terms into the ordered logistic regression model for 1-year glycemic control status (the order of 'improved', 'equivocal', and 'worsened'). The estimates and p values are adjusted for 'gastrectomy without duodenal bypass' and HOMA-IR. Significant values (p for interaction <0.05) are in boldface type.

OR, odds ratio; CI, confidence interval; BMI, body mass index; HbA1c, hemoglobin A1c; HOMA-IR, homeostasis model assessment-insulin resistance; GIP, gastric inhibitory polypeptide; GLP-1, glucagon-like peptide-1; PAI-1, plasminogen activator inhibitor-1.

## **Supplementary figures legends**

Supplementary Figure S1. Glycemic control status at 1-year visit according to the type of intervention. ESD, endoscopic submucosal dissection

Supplementary Figure S2. Changes in metabolic parameters from the baseline values.

(a) HbA1c, (b) fasting glucose, (c) postprandial glucose, (d) body mass index (BMI), (e) Homeostasis model of insulin resistance (HOMA-IR) during the follow-up period, according to the type of intervention.

§  $p < 0.05$  vs. ESD group (adjusted for age, sex, time from the baseline, and the baseline measurements of each metabolic parameter)

\*  $p < 0.05$  vs. baseline (adjusted for multiple comparisons using the method of Dunnett)

Supplementary Figure S3. Kaplan-Meier curves for composite event (recurrence of gastric cancer, myocardial infarction, stroke, coronary revascularization, and all cause death) according to the type of intervention.

## Supplementary figures

Figure S1

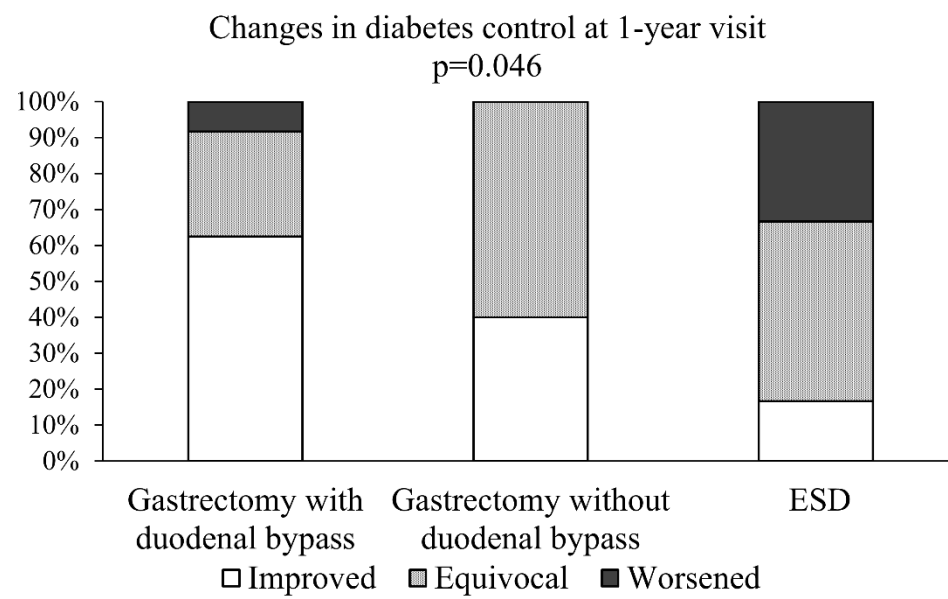



**Figure S2**

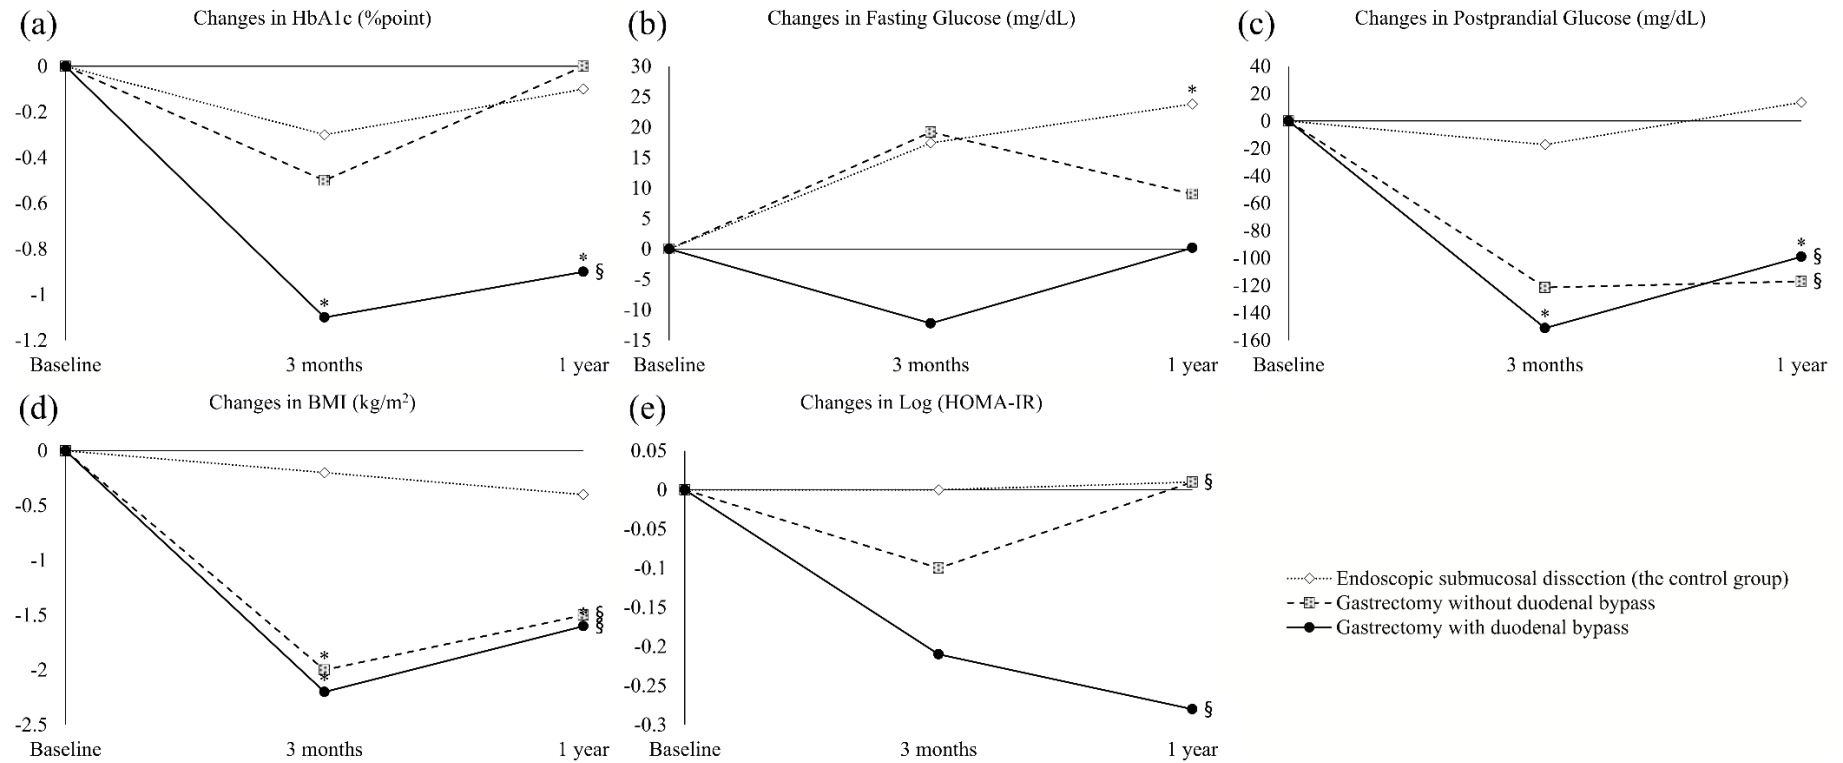

**Figure S3**

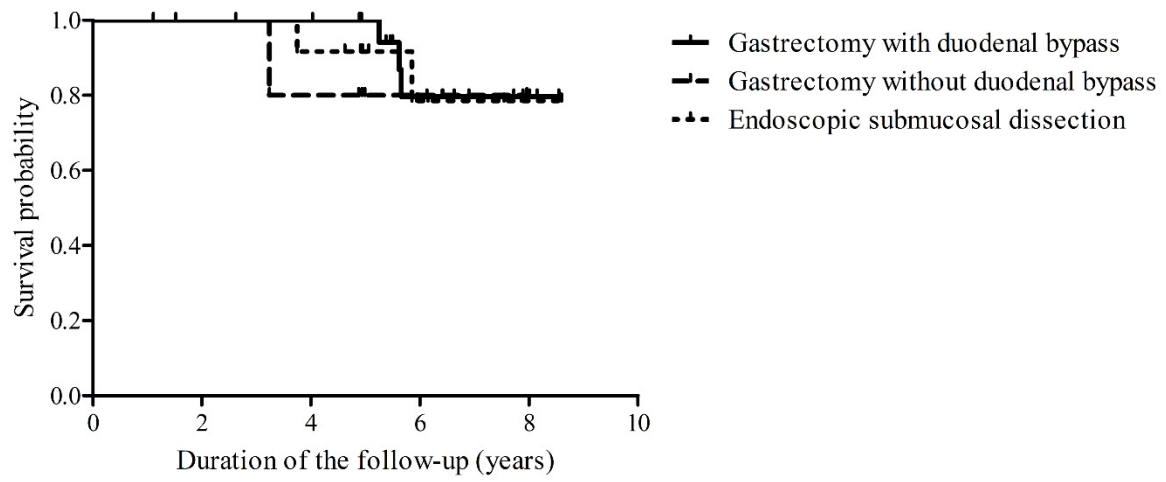

Supplement: s1 [file s1]
